# Supplementary material for: Strategy for the synthesis of zeolite Y by artificial-fish-reef breeding negative crystals
Source: Royal Society of Chemistry journal article supplement (doi:10.1039/d2qi00328g), 2022-01-01
Supplement: d2qi00328g1.pdf [file d2qi00328g1.pdf]

## Supporting Information

### Strategy for Synthesis of Zeolite Y by Artificial Fish Reef Breeding

#### Negative Crystals

Peng Liu<sup>ab</sup>, Tian Xia<sup>a</sup>, Suofu Nie<sup>a</sup>, Qiaoxia Guo<sup>c</sup>, Chunming Xu<sup>a</sup>, Baojian Shen<sup>\*a</sup>

<sup>a</sup> State Key Laboratory of Heavy Oil Processing; The Key Laboratory of Catalysis of CNPC; College of Chemical Engineering and Environment, China University of Petroleum, Beijing 102249, China

<sup>b</sup> School of Chemistry and Chemical Engineering, Key Laboratory of Green Chemical Media and Reactions, Ministry of Education, Henan Normal University, 453007 Xinxiang, Henan, China

<sup>c</sup> College of Science, China University of Petroleum, Beijing 102249, China

\* Corresponding author email: [baojian@cup.edu.cn](mailto:baojian@cup.edu.cn)

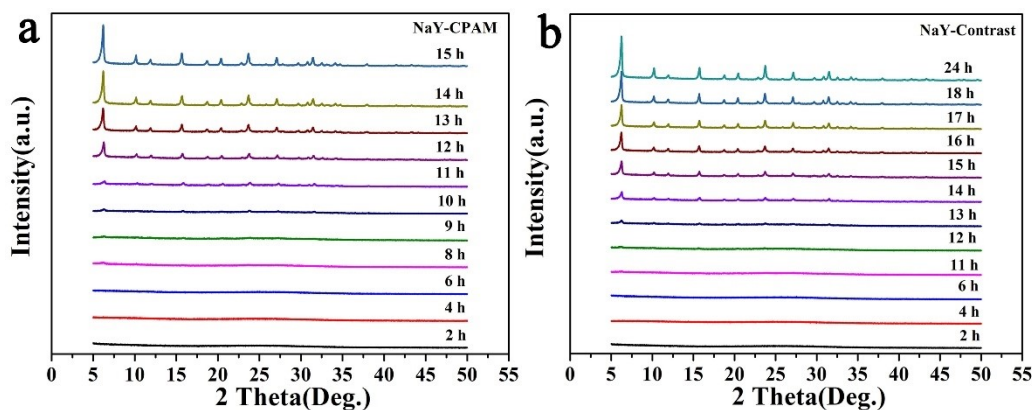

**Figure S1** XRD patterns of samples taken from gel at different crystallization time in the synthesis of NaY-CPAM (a) and NaY-contrast (b), respectively.

**Table S1** Crystallinity of aliquots taken from gel at different crystallization time in the preparation of NaY-CPAM and NaY-Contrast zeolites.

| Samples<br>(With CPAM) | Crystallization<br>time (h) | C/C <sub>0</sub><br>(%) | Samples<br>(Without CPAM) | Crystallization<br>time (h) | C/C <sub>0</sub><br>(%) |
|------------------------|-----------------------------|-------------------------|---------------------------|-----------------------------|-------------------------|
| L-1                    | 2                           | 0                       | L-1                       | 2                           | 0                       |
| L-2                    | 4                           | 0                       | L-2                       | 4                           | 0                       |
| L-3                    | 6                           | 0                       | L-3                       | 6                           | 0                       |
| L-4                    | 8                           | 0                       | L-4                       | 11                          | 0                       |
| L-5                    | 9                           | 16                      | L-5                       | 12                          | 13                      |
| L-6                    | 10                          | 34                      | L-6                       | 13                          | 20                      |
| L-7                    | 11                          | 44                      | L-7                       | 14                          | 35                      |
| L-8                    | 12                          | 49                      | L-8                       | 15                          | 40                      |
| L-9                    | 13                          | 64                      | L-9                       | 16                          | 57                      |
| L-10                   | 14                          | 85                      | L-10                      | 17                          | 63                      |
| L-11                   | 15                          | 95                      | L-11                      | 20                          | 90                      |
| —                      | —                           | —                       | L-12                      | 24                          | 94                      |

**Table S2** Relative crystallinity, SiO<sub>2</sub>/Al<sub>2</sub>O<sub>3</sub> mole ratio and unit cell of NaY-Reference, NaY-Contrast, and NaY-CPAM

| Sample        | C/C <sub>0</sub> , % | SiO <sub>2</sub> /Al <sub>2</sub> O <sub>3</sub> mole ratio | Unit cell (a <sub>0</sub> ), Å |
|---------------|----------------------|-------------------------------------------------------------|--------------------------------|
| NaY-Reference | 93                   | 5.0                                                         | 24.67                          |
| NaY-Contrast  | 94                   | 5.0                                                         | 24.67                          |
| NaY-CPAM      | 95                   | 5.2                                                         | 24.66                          |

**Table S3** Textural properties of NaY-Contrast and NaY-CPAM

| Sample       | S <sub>BET</sub> <sup>a</sup> ,<br>m <sup>2</sup> g <sup>-1</sup> | S <sub>Micro</sub> <sup>b</sup> ,<br>m <sup>2</sup> g <sup>-1</sup> | S <sub>External</sub> <sup>c</sup> ,<br>m <sup>2</sup> g <sup>-1</sup> | V <sub>total</sub> <sup>d</sup> ,<br>cm <sup>3</sup> g <sup>-1</sup> | V <sub>micro</sub> <sup>e</sup> ,<br>cm <sup>3</sup> g <sup>-1</sup> | V <sub>meso</sub> <sup>f</sup> ,<br>cm <sup>3</sup> g <sup>-1</sup> |
|--------------|-------------------------------------------------------------------|---------------------------------------------------------------------|------------------------------------------------------------------------|----------------------------------------------------------------------|----------------------------------------------------------------------|---------------------------------------------------------------------|
| NaY-Contrast | 746                                                               | 713                                                                 | 33                                                                     | 0.381                                                                | 0.349                                                                | 0.032                                                               |
| NaY-CPAM     | 736                                                               | 686                                                                 | 50                                                                     | 0.447                                                                | 0.335                                                                | 0.112                                                               |

<sup>a</sup> BET method; <sup>b, e</sup> t-plot method; <sup>c</sup> S<sub>External</sub> = S<sub>BET</sub> - S<sub>Micro</sub>; <sup>d</sup> Volume absorbed at  $p/p_0 = 0.9944$ ; <sup>f</sup> V<sub>meso</sub> = V<sub>pore</sub> - V<sub>micro</sub>

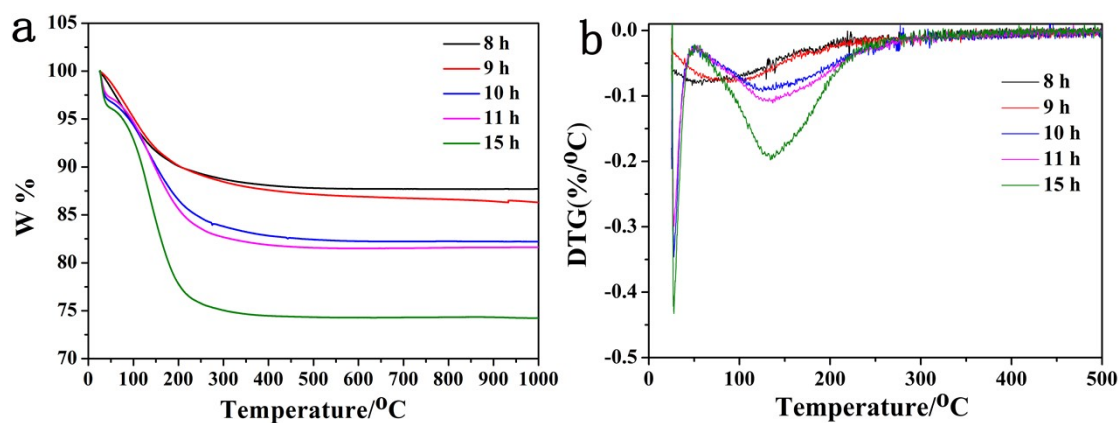

**Figure S2** TG (a) and DTG (b) curves of samples from different crystallization time in the synthesis of NaY-CPAM zeolite

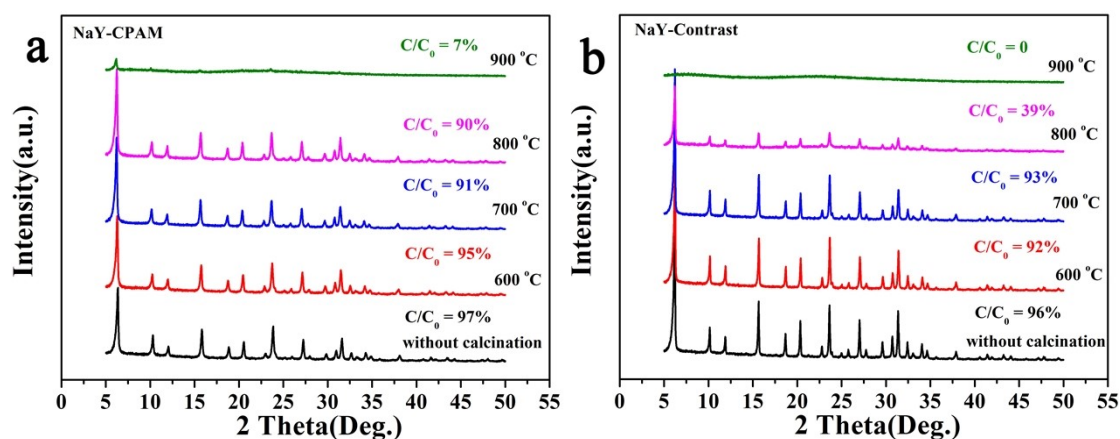

**Figure S3** XRD patterns of NaY-CPAM (a) and NaY-Contrast (b) after calcinating at different temperature for 2 h.

**Table S4** Relative crystallinity for NaY-CPAM and NaY-Contrast zeolites after calcinating at different temperature for 2 h.

| Samples      | Relative crystallinity corresponding to different calcination temperature, $C/C_0$ / % |        |        |        |        |
|--------------|----------------------------------------------------------------------------------------|--------|--------|--------|--------|
|              | Without calcination                                                                    | 600 °C | 700 °C | 800 °C | 900 °C |
| NaY-Contrast | 96                                                                                     | 92     | 93     | 39     | 0      |
| NaY-CPAM     | 97                                                                                     | 95     | 91     | 90     | 7      |

**Table S5**  $\text{SiO}_2/\text{Al}_2\text{O}_3$  mole ratio and Na content of NaY-Contrast and NaY-CPAM determined by XRF and XPS.

| Samples      | XRF <sup>a</sup>                       |                                                   | XPS <sup>b</sup>  |                                                   |
|--------------|----------------------------------------|---------------------------------------------------|-------------------|---------------------------------------------------|
|              | $\text{Na}_2\text{O}$ wt% <sup>a</sup> | $\text{SiO}_2/\text{Al}_2\text{O}_3$ <sup>a</sup> | Na % <sup>b</sup> | $\text{SiO}_2/\text{Al}_2\text{O}_3$ <sup>b</sup> |
| NaY-Contrast | 14.97                                  | 5.2                                               | 15.00             | 3.0                                               |
| NaY-CPAM     | 14.07                                  | 5.2                                               | 14.02             | 4.8                                               |

<sup>a</sup> Bulk  $\text{Na}_2\text{O}$  wt% and  $\text{SiO}_2/\text{Al}_2\text{O}_3$  mole ratio determined by XRF. <sup>b</sup> Na content and  $\text{SiO}_2/\text{Al}_2\text{O}_3$  mole ratio on the external determined by XPS.

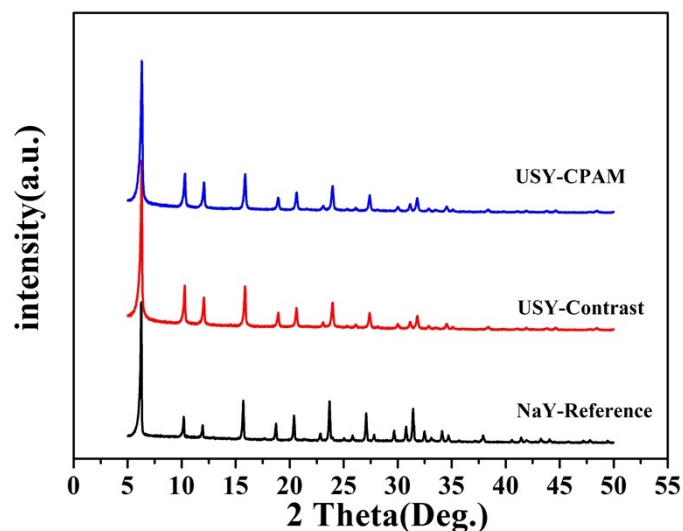

**Figure S4** XRD patterns of USY-Contrast and USY-CPAM zeolites.

**Table S6** Crystallinity, unit cell constant, framework  $\text{SiO}_2/\text{Al}_2\text{O}_3$  mole ratio (obtained by XRD) and content of  $\text{Na}_2\text{O}$ , bulk  $\text{SiO}_2/\text{Al}_2\text{O}_3$  mole ratio (obtained by XRF) on USY-Contrast and USY-CPAM zeolites

| Sample       | C/C <sub>0</sub> /% | a <sub>0</sub> (Å) | SiO <sub>2</sub> /Al <sub>2</sub> O <sub>3</sub> |     | Na <sub>2</sub> O wt% |
|--------------|---------------------|--------------------|--------------------------------------------------|-----|-----------------------|
|              |                     |                    | XRD                                              | XRF |                       |
| USY-Contrast | 73                  | 24.40              | 13.8                                             | 6.6 | 0.61                  |
| USY-CPAM     | 76                  | 24.37              | 16.4                                             | 7.0 | 0.54                  |

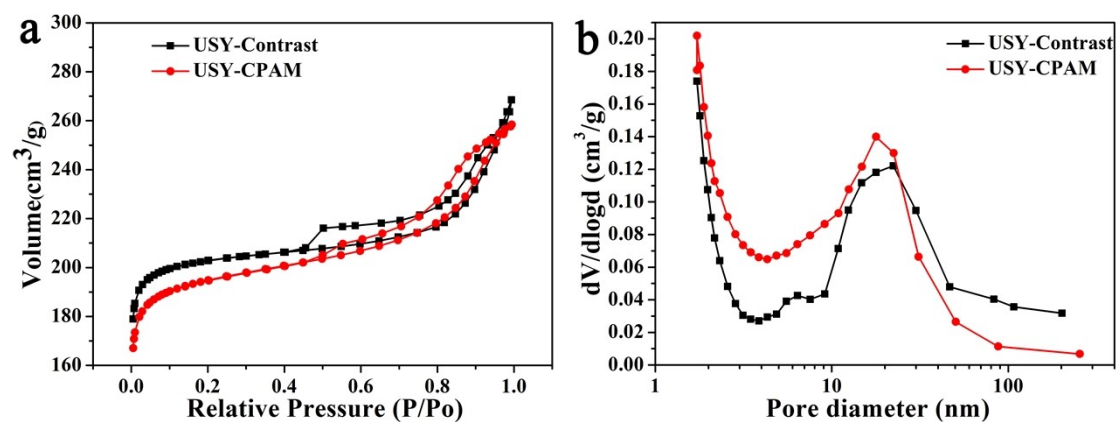

**Figure S5** Isotherms curves (a) and pore distribution curves (adsorption branch) (b) on USY-Contrast and USY-CPAM zeolites.

**Table S7** Texture properties of USY-Contrast and USY-CPAM zeolites.

| Samples      | S <sub>BET</sub> <sup>a</sup><br>m <sup>2</sup> ·g <sup>-1</sup> | S <sub>Micro</sub> <sup>b</sup><br>m <sup>2</sup> ·g <sup>-1</sup> | S <sub>External</sub> <sup>c</sup><br>m <sup>2</sup> ·g <sup>-1</sup> | V <sub>total</sub> <sup>d</sup><br>cm <sup>3</sup> ·g <sup>-1</sup> | V <sub>micro</sub> <sup>e</sup><br>cm <sup>3</sup> ·g <sup>-1</sup> | V <sub>meso</sub> <sup>f</sup><br>cm <sup>3</sup> ·g <sup>-1</sup> |
|--------------|------------------------------------------------------------------|--------------------------------------------------------------------|-----------------------------------------------------------------------|---------------------------------------------------------------------|---------------------------------------------------------------------|--------------------------------------------------------------------|
| USY-Contrast | 649                                                              | 578                                                                | 71                                                                    | 0.415                                                               | 0.282                                                               | 0.133                                                              |
| USY-CPAM     | 628                                                              | 527                                                                | 101                                                                   | 0.400                                                               | 0.257                                                               | 0.143                                                              |

<sup>a</sup> BET method; <sup>b, e</sup> t-plot method; <sup>c</sup> S<sub>External</sub> = S<sub>BET</sub> - S<sub>Micro</sub>; <sup>d</sup> Volume absorbed at  $p/p_0 = 0.9944$ ; <sup>f</sup> V<sub>meso</sub> = V<sub>pore</sub> - V<sub>micro</sub>

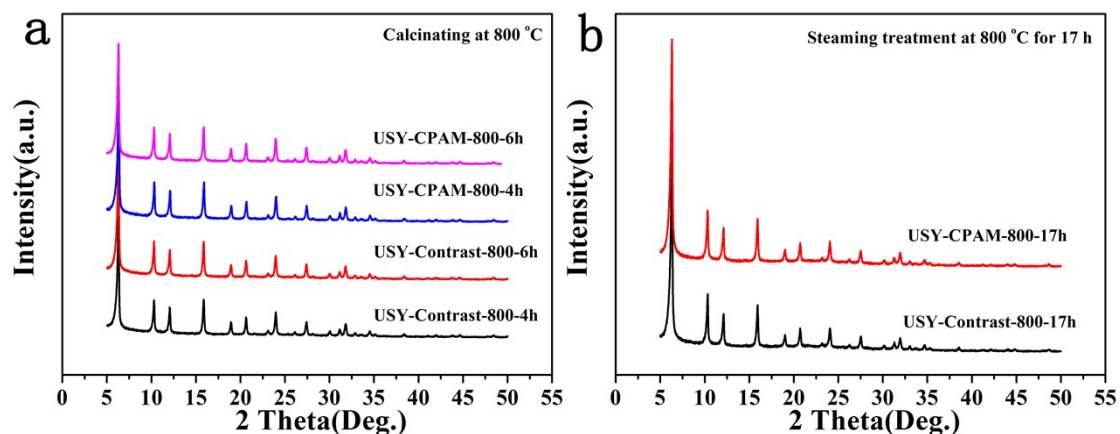

**Figure S6** XRD patterns of USY-Contrast and USY-CPAM zeolites after calcinating at 800 °C for 4h and 6h (a) and steaming treatment at 800 °C for 17h (b).

**Table S8** Crystallinity of USY-Contrast and USY-CPAM zeolites after calcinating at 800 °C for 4h and 6h and steaming treatment at 800 °C for 17h

| Samples              | Crystallinity / % |
|----------------------|-------------------|
| USY-Contrast-800-4h  | 81                |
| USY-Contrast-800-6h  | 70                |
| USY-Contrast-800-17h | 60                |
| USY-CPAM-800-4h      | 86                |
| USY-CPAM-800-6h      | 83                |
| USY-CPAM-800-17h     | 61                |

**Table S9** Concentrations of Brønsted acid (B) and Lewis acid sites (L) for USY-Contrast and USY-CPAM zeolites.

| Samples      | Total acid sites (200 °C),<br>$\mu\text{mol}\cdot\text{g}^{-1}$ |     |     |     | Strong acid sites (350 °C),<br>$\mu\text{mol}\cdot\text{g}^{-1}$ |    |     |     |
|--------------|-----------------------------------------------------------------|-----|-----|-----|------------------------------------------------------------------|----|-----|-----|
|              | L                                                               | B   | L+B | B/L | L                                                                | B  | L+B | B/L |
| USY-Contrast | 107                                                             | 217 | 326 | 2.0 | 70                                                               | 74 | 144 | 1.1 |
| USY-CPAM     | 182                                                             | 164 | 346 | 0.9 | 129                                                              | 78 | 207 | 0.6 |

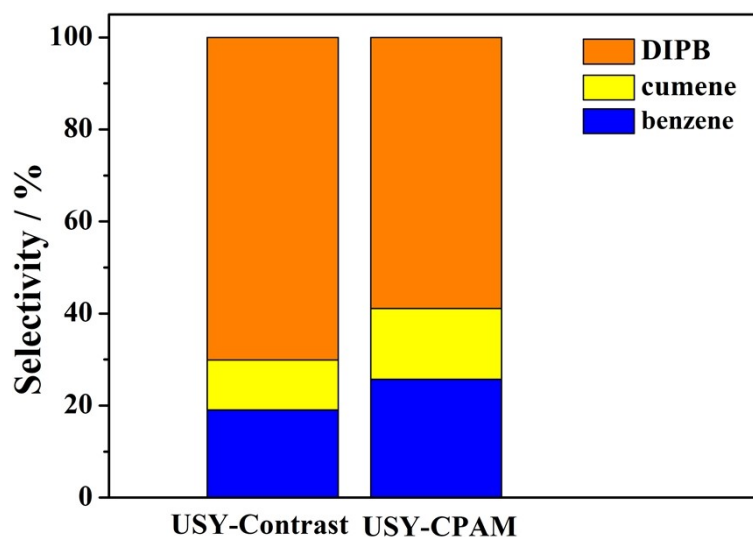

**Figure S7** Selectivity on USY-Contrast and USY-CPAM catalysts during the TIPB conversion for DIPB, Cumene, and Benzene under identical conditions (T = 200 °C, FTIPB = 10  $\mu$ L/min, TOS = 15 min).
